# Supplementary material
Source: HighWire-hosted journal article supplement (http://rc.rcjournal.com/highwire/filestream/21246/field_highwire_adjunct_files/1/suppl_2.docx)
Supplement: suppl_2.docx [file suppl_2.docx]

| **Supplemental Table 2**. Adherence (≥0.8) to combined therapy metrics by age group | | | | | |
| --- | --- | --- | --- | --- | --- |
|  | Overall | 0-6 years | 7-12 years | 13-19 years |  |
| Metrics | n(%) | n(%) | n(%) | n(%) | p-value* |
| Daily Treatment | 42 (67.7) | 14 (77.8)a | 17 (89.5)a | 11 (44.0)b | 0.004 |
| Daily Treatment +  Treatments per Day | 31 (50.0) | 10 (55.6)a | 16 (84.2)a | 5 (20.0)b | <0.001 |
| Daily Treatment +  Treatments per Day+  Treatment Duration | 26 (41.9) | 10 (55.6)a | 13 (68.4)a | 3 (12.0)b | <0.001 |
| Daily Treatment +  Treatments per Day+  Treatment Duration+  Frequency Settings | 17 (27.4) | 8 (44.4)a | 7 (36.8)a | 2 (8.0)b | 0.011 |
| Daily Treatment +  Treatments per Day+  Treatment Duration+  Frequency Settings+  Freq. Pressure Settings | 13 (21.0) | 8 (44.4)a | 4 (21.1)a,b | 1 (4.0)b | 0.005 |
| *P-value for Fischer’s Exact Test  a,bDifferent letters denote statistically significant difference in pairwise comparisons using Fischer’s Exact Test (e.g,. a vs. b = p<0.05). | | | | | |
